# Supplementary material for: Facile synthesis of water soluble reduced graphene oxide with a high concentration and its application in printable micro-supercapacitors
Source: Royal Society of Chemistry journal article supplement (doi:10.1039/c7se00214a), 2017-01-01
Supplement: c7se00214a1.pdf [file c7se00214a1.pdf]

## Supporting Information

### **Facile synthesis of water soluble reduced graphene oxide with high concentration and its application in the printable micro-supercapacitors**

Haibo Su<sup>a,b</sup>, Pengli Zhu<sup>a,\*</sup>, Leicong Zhang<sup>a</sup>, Fengrui Zhou<sup>a</sup>, Xianwen Liang<sup>a</sup>, Tingxi Li<sup>b,\*</sup>, Qing Wang<sup>b,\*</sup>, Rong Sun<sup>a,\*</sup>, and Chingping Wong<sup>c,d</sup>

*<sup>a</sup>Shenzhen Institutes of Advanced Technology, Chinese Academy of Sciences, Shenzhen 518055, P.R. China*

*<sup>b</sup>School of Materials Science and Engineering, Shandong University of Science and Technology, Qingdao 266590, P.R. China*

*<sup>c</sup>School of Materials Science and Engineering, Georgia Institute of Technology, Atlanta, USA*

*<sup>d</sup>Department of Electronics Engineering, the Chinese University of Hong Kong, Hong Kong.*

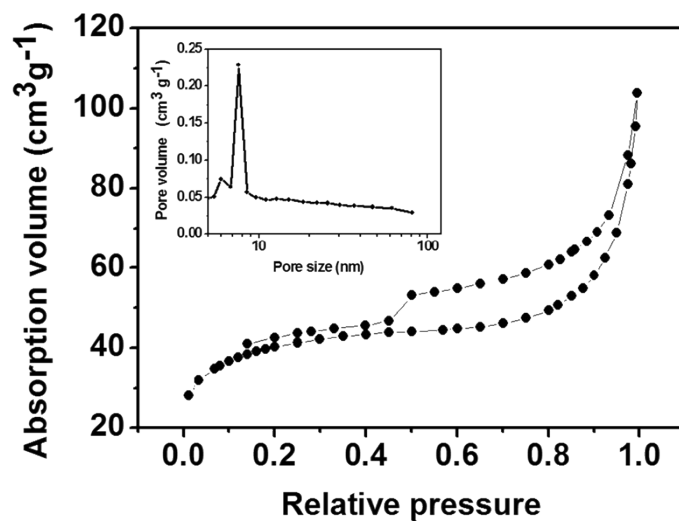

Fig. S1 N<sub>2</sub> sorption and pore size distribution of WSG.

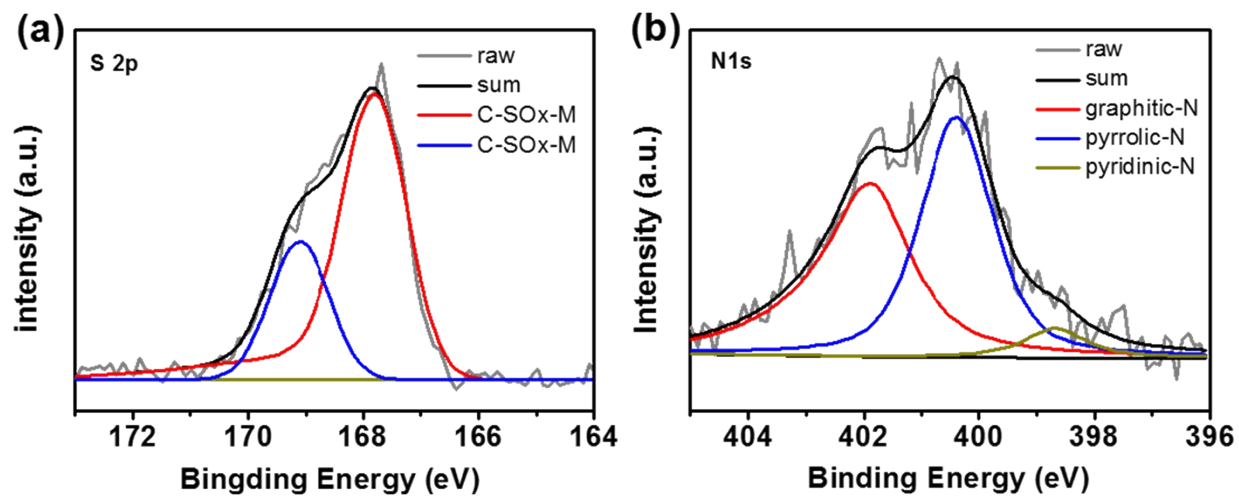

Fig. S2 XPS survey spectra of WSG, high-resolution (a) S 2p and (b) N 1s.
